1 **Incidence and Determinants of loss to follow-up of HIV pre-exposure prophylaxis among key**  
2 **and priority population groups in Addis Ababa health centers, Ethiopia retrospective cohort**  
3 **study.**

4

5 Addisu Aragaw M.Sc.,<sup>1, \*</sup> Fentaw Taddse Msc,<sup>2</sup>

6

7 1. Department of public health, GAMBY Medical and Business college; PO Box **106** (C-

8 1035); Addis Ababa Ethiopia

9 2. Department of Epidemiology, Wollo University; Wollo Ethiopia.

10

11 Conflicts of Interest: The authors attest that they have no financial or other conflicts of interest.

12

13 \*Corresponding author:

14 1. Addisu Aragaw Abit, MSc, BSc. | Department of public health, GAMBY Medical and

15 Business college; PO Box **106** (C-1035); Addis Ababa Ethiopia

16 Email: [aragawaddisu@gmail.com](mailto:aragawaddisu@gmail.com)

17 **ABSTRACT**

18 Background: - ‘loss of follow-up’ is a significant public health concern globally. Retention in

19 preventive care among at-risk key and priority population groups is critical for the successful

20 prevention of HIV acquisition. Loss to follow-up of individuals has countless negative impacts on

21 HIV prevention outcomes. There is, however, limited information about the incidence and

22 predictors of loss to follow-up in the study area. Thus, this study aimed to determine the incidence

23 rate and predictors of loss to follow-up among Prep users.

24 Method: - A retrospective cohort study was undertaken using 240 PrEP users between May 2020,  
25 and May 26, 2022, at Addis Ababa selected health centers. All eligible clients who fulfilled the  
26 inclusion criteria were included in study.

27 **Results and discussion:** A total of 240 participants with a median age of 32.0 years (interquartile  
28 range [IQR]: 27.0 to 40.0) had a median time since initiation of PrEP 21.2 months (IQR: 6.5 to  
29 22.1). Almost half 122 (50.8%) were married, single 58 (24.2%), divorced 10 (4.2%), and widowed  
30 50 (20.8%). One third were female sex workers (33.3%), and the rest (66.7%) were sero- discordant  
31 couples. Most of the users were from ART clinics (60.8%) and (39.2%) were from  
32 PMTCT clinics Being male is associated with 1.77 times in risk of getting lost than female  
33 (ARR=1.77, 95% CI =1.12-2.79). those who had no adherence counseling was associated with  
34 1.86 times in the chance of LTFU as compared to those who had have adherence counseling  
35 (ARR=1.863, 95% CI =1.184, 2.930, P-value=0.003). 86 (35.8%) experienced loss to follow-up  
36 and the overall incidence rate of loss to follow-up was 7.3 (95% CI: 4.3-12.6) per 100 person-years  
37 of observation (PYs). PrEP adherence strategies should be developed and designed as a holistic  
38 approach, acknowledging the contextual factors of key population groups.

39 **Conclusion:** - About 35.8% clients became LTFU of PrEP with overall incidence of 7.3(4.3-12.6)  
40 per 100 pys observation. Research preparedness involving key and priority population groups  
41 should be strengthened for HIV prevention intervention evaluations in Ethiopia.

## 42 INTRODUCTION

43 Health is among the seventeen sustainable development goals (SDGs) whose promise is to end  
44 the epidemic of AIDS, tuberculosis, malaria among others by the year 2030. (1) Globally, by 2017,  
45 the number of people living with AIDS (PLHIA) were estimated to be between 31.1 to 43.9 million  
46 with those newly infected (all ages) being approximately 1.4 to 2.4 million. (2)

47 Human immunodeficiency virus infection and acquired immune deficiency syndrome (HIV/AIDS)  
48 continue to be a major global public health issue. By the end of 2018, an estimated 37.9 million  
49 individuals worldwide were living with HIV/ AIDS. (3, 4) HIV remains a global health crisis. In  
50 2020, there were: 37.9 million people living with HIV, including 10.2 million who were not on  
51 treatment: 1.5 million New HIV infections and 680 000 AIDS-related deaths. (5) Overall, key  
52 populations and their sexual partners accounted for 65% of HIV infections. worldwide in 2020 and  
53 93% of infections outside of sub-Saharan Africa. (5) However, not all population subcategories  
54 face the same risk of acquiring HIV/AIDS. (4)

55 Globally and in Africa specifically, female sex workers (FSWs) are at an extraordinarily high risk  
56 of contracting HIV.(6) Globally Sex workers are accounted 11%, People who inject drugs 9%,  
57 ,Transgender women 2% Remaining Population 35% Clients of sex workers and sex partners of  
58 all key populations 20% (5) and In sub-Sahara Africa Sex workers are 12% People who inject  
59 drugs are 1% Gay men and other men who have sex with men 6% Transgender Women 1% Clients  
60 of sex workers and sex partners of all key populations 19% ,Remaining population are 61%.(7)

61 An estimated 29.3% of FSWs were living with HIV/AIDS in sub-Saharan Africa in 2014.(8)

62 Meanwhile, research has indicated that sex workers and clients of sex workers and other sexual  
63 partners account for 3% and 19% of new yearly HIV infections, respectively.

64 Oral pre-exposure prophylaxis (PrEP) is a novel biomedical HIV prevention intervention  
65 recommended for use by the World Health Organization (WHO) among key populations including  
66 FSWs. (16) To avert this ongoing new HIV infection, a combination HIV prevention approach  
67 including PrEP as an additional component is crucial Oral tenofovir disoproxil fumarate (TDF) is  
68 the currently recommended PrEP regimen for women medication which is recommended to be  
69 taken daily. It offers a locus of control for women to be in charge of their HIV prevention choices.

70 (17) Considering this, PrEP is endorsed in the national comprehensive HIV Prevention, care and  
71 treatment guideline and HIV prevention roadmap (2018-2020). Currently, the PrEP services have  
72 been provided in public health facilities and DICs for FSWs and HIV negative sero-discordant  
73 partners. (15)

74 Globally they make up to 9% new HIV infections. They are 13 times more at risk of HIV as  
75 compared to the general population due to an increased likelihood of being economically  
76 vulnerable, unable to negotiate consistent condom use and experiencing violence, criminalization  
77 and marginalization. (9) and make up a small proportion of the general population, but they are at  
78 extremely high risk of HIV infection. (10)

79 During the last two decades, the Ethiopia responded vigorously to curb the epidemic through  
80 a multi-sectorial approach involving all stakeholders, mobilizing resources and the community at  
81 large (11). This may result in failure to achieve the desired programmatic objectives in reducing  
82 HIV incidence due to high dropout rates among clients initiated on PrEP who may end up being  
83 exposed to HIV acquisition risk. In order to achieve desired programmatic objectives; this study  
84 sought to describe possible contributors to PrEP lost follow up as well as factors which may affect  
85 continued use of PrEP. Counseling services provided for HIV negative clients to remain negative  
86 and provision of PrEP uses as one strategy to reduce new infections and HIV acquisition Currently,  
87 characteristics and factors of Pre-exposure prophylaxis (PrEp) is part of HIV testing and  
88 antiretroviral medicine based strategies among other combinations prevention programs towards  
89 attainments of UNAIDS targets of three 95 accessing tailored with three million individuals alone  
90 targeted for PrEP.(12)

91 The targeted populations include female sex workers, sero discordant couples and their sexual  
92 partners in high prevalence sites supported by PEPFAR. Ethiopia started rolling out PrEP in late

93 2019, targeting female sex workers and HIV discordant couples. For the initial phase, 15,400  
94 female sex workers and 4,762, couples in discordant relationships were targeted. By December  
95 2019, the number of people screened for PrEP services were 4,128, of which 1589, were found  
96 eligible, 971 were initiated while 601 (61.9%) declined. (13) The current HIV epidemic in the  
97 Federal Democratic Republic of Ethiopia is low intensity, mixed epidemic kind with important  
98 non uniformity across geographic areas and population groups. The national HIV prevalence is  
99 calculated to be 0.9%, urban areas are a lot more affected than rural areas (2.9% versus 0.4%)  
100 whereas females are double as affected as male (1.2% versus 0.6%). Out of the eleven regional  
101 states and town administrations, seven have HIV prevalence of 1% and above. Key and priority  
102 populations (KP & PP) are disproportionally affected compared with the national average: 23%  
103 among feminine Sex staff (FSW), 5.1 % discordant couples.

104 In HIV negative partners of sero-discordant couples: There is no reliable data source/s on  
105 the level of discordance. However, more than 60% of adult PLHIV and 80% of sexually active  
106 PLHIV are currently married and report relatively little extra marital risk behaviors. Roughly  
107 twothirds of these have sero-discordant sexual partners. (12) Discordant couples have the highest  
108 risk of acquiring HIV. From the total HIV positive couples in Addis Ababa, 5.1 % of them were  
109 found to be discordant. (14) In Ethiopia, there are still new infections annually largely moving the  
110 Key population and priority population groups. From WHO's recommendation, Pre-Exposure  
111 prophylaxis (PrEP) of HIV is one in all the interventions that facilitate countries to cut back new  
112 HIV infection. (6)

113 Ethiopia may not reach its UNAIDS goals to end ADIS by 2030 without specifically  
114 addressing among key population and as far as my knowledge concerns there is no literature in  
115 Ethiopian on assessing incidence and determinants of lost follow up of pre-exposure prophylaxis

116 users among key population. Our study therefore assessed incidence and determinants of lost  
117 follow up of pre-exposure prophylaxis users among key population in Addis Ababa.  
118 Ethiopia has committed itself reaching the goal of 95-95-95 targets towards the management and  
119 control of HIV adopted the use of PrEP as among the most recent robust and effective HIV  
120 preventions interventions (15).

121 Carrying out this study is important to determine the lost follow up factors of HIV preexposure  
122 prophylaxis (PrEP) and the factors associated with PrEP and their adherence level in each follow  
123 up visit among key population groups. Therefore, the national program requires further  
124 understanding on what is driving this challenge in order to come up with programmatic  
125 interventions to improve PrEP continuation rates.

126 Despite the rapid expansion of antiretroviral therapy services, ‘loss to follow-up’ is a  
127 significant public health concern globally. Loss to follow-up of individuals from pre –exposure  
128 follow up has a countless negative impact on the incidences for HIV and its prevention.

129 Loss to follow-up is a serious public health concern throughout the world. In Ethiopia, there  
130 is limited information regarding incidence and predictors of loss to follow-up among key  
131 population groups on pre-exposure prophylaxis users. It is worth it to scale up PrEP service  
132 nationwide to contribute to the reduction of new HIV infections.

133 The study is designed to provide baseline data for program planners, decision-makers, and  
134 pre-exposure prophylaxis implementers at a different level. The study provides baseline  
135 information for governmental and non -governmental organization that works in collaboration with  
136 the federal ministry of health’s area of HIV/AIDS particularly on pre-exposure prophylaxis’s study  
137 provides information regarding the current factors associated with pre-exposure loss to follow-up  
138 and the existing gap.

## 139 **METHODS**

### 140 Study Design and Recruitment

141 The study was conducted in Addis Ababa city administration health centers is the capital of  
142 Ethiopia. The national central statistical agency that carries out national census projections put  
143 the population of Addis Ababa to be 3,273, 000 (CSA, 2015) based on this figure, the population  
144 of Addis Ababa accounts for 3.6% of the national population and 18% of the urban population in  
145 Ethiopia. It has shown an annual rate of population growth of 2.1 %. (9) In Addis Ababa city  
146 administration, there are different governmental, private and non-governmental health facilities  
147 which provide HIV comprehensive services. The city administration has 11 sub cities and 99  
148 health centers and among these five health centers were selected for the study being conducted.  
149 The study was conducted from May 1, 2022 to June 30, 2022. Retrospective cohort study design  
150 was employed to determine the incidence and determinants of loss to follow-up (LTFU) of HIV  
151 pre-Exposure prophylaxis.

152 **Source population** All clients of pre-exposure prophylaxis who were initiated on PrEP at  
153 Addis Ababa Health centers. *Study population:* All clients of pre-exposure prophylaxis who were  
154 initiated on PrEP from May 30, 2020, to May 26, 2022, at Addis Ababa selected health centers.

155 The sample size was determined by using the EPI INFO version 7.2.3.1 using the cohort study  
156 design formula. From the study, the proportion of among FSW exposed with loss to follow up was  
157 49. %, and among non-exposed who have lost follow up of none FSW were 68.9% (45).  
158 Considering 95% confidence interval, 80% power. Finally, by using one to two ratios of the  
159 exposed to non-exposed ratio (1:2), then the final total sample size was found to be 240 (80 exposed  
160 and 160 non exposed groups).

161 Exposed group Study participants who were female sex worker during study period was considered  
162 as exposed group and as a Non-Exposed group Study participants who were not female sex worker.

163 **Sampling Procedure** A simple random sampling technique was employed. Among 11 sub-cities  
164 in Addis Ababa five health centers were selected from the selected sub-cities. Then a total sample  
165 of 240 was distributed to the five health centers based on the proportion of PrEP takers in each  
166 health center.

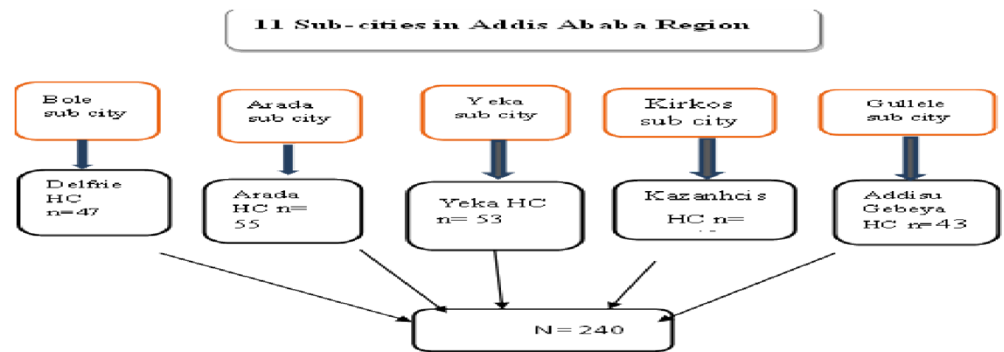

167  
168 **Figure 1. Schematic presentation for sampling techniques**

169 Inclusion criteria All selected participants who started pre –Exposure prophylaxis in between  
170 December,2020 and First December,2022 was included based on the record review. Clients  
171 excluded from analysis, (had an incorrect medical record number (n=16), did not meet criteria for  
172 PrEP (n=11), who had in complete information(n=13)), the study excluded clients who were  
173 transferred to other health facilities.

174 As Outcome/dependent Variable Loss to follow up of pre-exposure prophylaxis which is  
175 dichotomies as 1 if “Yes” and 0 “No”.

176 *Independent Variable*, Socio demographic or Socio-economic factors: sex, age, marital status,  
177 phone functionality, region/address and level of education, Baseline clinical and laboratory  
178 information: - Baseline HBsAg Test result, Pregnancy Status, Syndrome STI Screening and STI  
179 Diagnosis result, Pre exposure follows up status: - Transfer out, Transfer in, Died, Lost, and Missed  
180 Dose, Pre exposure prophylaxis follow up information: - adherences status, drug side effect, HIV



181 retest status, pregnancy status, use, type family planning, - Female Sex Workers and Sero  
182 Discordant Couples

183 *Operational definitions*

184 *Lost to follow up (LTFU)* if they were late by >90 days for their scheduled appointment date (16).

185 Pre-Exposure Prophylaxis (PrEP): - Defined as the use of antiretroviral drugs by HIV-negative  
186 people, before potential exposure to prevent the acquisition of HIV (11).

187 Key populations: - are populations who are at higher risk for HIV irrespective of the epidemic type  
188 or local context and who face social and legal challenges that increase their vulnerability or  
189 describe a category of populations of special interest in the HIV epidemic (17).

190 Adherence: - Is defined as those who are missing less than 4 doses have good adherences and  
191 missing 5 plus dose are poor adherences (18).

192 Female sex workers: - are defined as women who regularly or occasionally exchange sex for money  
193 in drinking establishments, night clubs, local drink houses, “chat” and “shisha” houses, “on the  
194 street”, around military and refugee camps, construction sites, trade routes, red light districts, and  
195 at their homes

196 *Ethical consideration*

197 The program evaluation was approved by Addis Ababa Public Health Research and  
198 Emergency Management Directorate review board and the school of GAMBY medical and  
199 Business College's ethical review committee. Human research protection procedures were  
200 determined to be research, but investigators did not interact with human subjects or have access to  
201 identifiable data or specimens for research purposes. Individual consent to use clients’ secondary  
202 data was waived by the IRBs.

203 **Statistical Analysis**

204 The data were edited, cleaned, coded, and entered into Epi- info window version 7.2.3.1 and  
205 analyzed using SPSS windows version 20.

206 Descriptive statistics i.e., frequencies were run to check for outliers. Data were summarized  
207 using frequencies and percentages for categorical covariates and numerical were summarized with  
208 mean  $\pm$  standard deviation (SD) or medians with interquartile range (IQR) values as required.  
209 Baseline characteristics of participants who had follow-up and those who were lost-to-follow-up  
210 were compared by using Chi-square tests (for categorical variables) or independent sample t-tests  
211 (for continuous variables).

212 The association between the dependent variables and the outcome of pre-exposure follow-up  
213 was analyzed using the robust Poisson regression model. Univariate robust regression was run at  
214 a 25% level of significance to screen our potential significance of independent variables. The  
215 multivariable robust Poisson regression model was performed using significant independent  
216 variables from univariate robust Poisson regression.

217 To measure the presence and strength of associations between the predictor and outcome  
218 variable relative risk (RR), a p-value and 95% CI were used. From the final model, variables with  
219 a P-value  $\leq 0.05$  were considered as significantly associated with the outcome of loss to follow-up  
220 pre-exposure prophylaxis.

221 The overall fitness of the model (model adequacy) was assessed by using the goodness of fit  
222 test and omnibus test.

## 223 **RESULTS**

224 Among key and priority population groups who were taking PrEP registered for the program  
225 from 2019 –2022 data of 240 were retrieved from PrEP registration and client’s card for the study.  
226 At the beginning of PrEP started the median age was 32.0 years (interquartile range [IQR]: 27.0 to

227 40.0). Out of 240 participants followed during the study period, almost two-third 154 (64.2%) were  
 228 females and the remaining 86 (35.8%) were males. Almost half 122 (50.8%) were married, single  
 229 58 (24.2%), divorced 10 (4.2%), and widowed 50 (20.8%). Regarding educational status  
 230 participants with no formal education 68 (28.3%), primary education 97 (40.4%), secondary  
 231 education 56 (23.3%) college and above 19 (7.9%). More than half of 124 (51.7%) of them had  
 232 functional cell phone and others had no functional cell phone 116 (48.3%) and most of 220 (91.2%)  
 233 lived in the study area, Addis Ababa and 20(8.8% lived out of Addis Ababa (Table 1).

234 **Table 1. baseline socio demographic characteristics of Individuals (n=240)**

| Characteristics       | Categories         | Frequency (n) | Percentage (%) |
|-----------------------|--------------------|---------------|----------------|
| <b>Sex</b>            | Male               | 86            | 35.8           |
|                       | Female             | 154           | 64.2           |
| <b>Age</b>            | 21-30              | 82            | 34.2           |
|                       | 31-40              | 103           | 42.9           |
|                       | 41-50              | 48            | 20.0           |
|                       | 51-60              | 7             | 2.9            |
| <b>Marital status</b> | Single             | 58            | 24.2           |
|                       | Married            | 122           | 50.8           |
|                       | Divorced           | 50            | 20.8           |
|                       | Widowed            | 10            | 4.2            |
| <b>Living Address</b> | Within Addis Ababa | 220           | 91.2           |
|                       | Out of Addis Ababa | 20            | 8.8            |

235  
 236 Based on the Population category one third were female sex workers 80 (33.3%), and the rest 160  
 237 (66.7%) were not female sex workers. Most of the users were from ART clinics 146 (60.8%) and  
 238 94 (39.2%) were from PMTCT clinics (Table 2).

239 **Table 2. HIV Risk Classification and PrEP Service Delivery Point of Individuals Started**  
 240 **PrEP (n=240)**

| Characteristics | Categories | Frequency (n) | Percentage (%) |
|-----------------|------------|---------------|----------------|
|-----------------|------------|---------------|----------------|

|                                |                         |     |      |
|--------------------------------|-------------------------|-----|------|
| <b>PrEP provision site</b>     | ART                     | 146 | 60.8 |
|                                | PMTCT                   | 94  | 39.2 |
| <b>HIV risk classification</b> | Female sex workers      | 80  | 33.3 |
|                                | None female sex workers | 160 | 66.7 |

241 Among the respondents, half 121 (50.4%) of them were screened for hepatitis B virus and 119  
 242 (49.6%) didn't screened. All users (100%) were screened for Pregnancy majority of them were  
 243 negative 153(88.9%) and 19 (11.1%) tested positive (pregnant) only 88.9% were screened for TB  
 244 and none of them developed TB. 201 (83.7%) screened for sexually transmitted infection. among  
 245 them diagnosed with urethral discharge 17 (8.3%), vaginal discharge 33 (16.3%) genital ulcer 8  
 246 (4.3%) and none of them hadn't, scrotal swelling, inguinal bubo, and lower abdominal pain as  
 247 shown in table 3.

248 **Table 3. Baseline clinical and laboratory information of Individuals Started PrEP (n=240)**  
 249

| <b>Characteristics</b>          | <b>Categories</b>  | <b>Frequency (n)</b> | <b>Percentage (%)</b> |
|---------------------------------|--------------------|----------------------|-----------------------|
| <b>Screened for Hepatitis</b>   | Yes                | 121                  | 50.4                  |
|                                 | No                 | 119                  | 49.6                  |
| <b>Hepatitis testing result</b> | Not done           | 127                  | 52.9                  |
|                                 | Negative           | 113                  | 47.1                  |
| <b>Pregnancy testing result</b> | Positive           | 19                   | 11.1                  |
|                                 | Negative           | 153                  | 88.9                  |
| <b>screened for TB</b>          | Yes                | 202                  | 84.2                  |
|                                 | No                 | 38                   | 15.8                  |
| <b>Screened for STI</b>         | Yes                | 201                  | 83.8                  |
|                                 | No                 | 39                   | 16.3                  |
| <b>Diagnosed with STI</b>       | Yes                | 78                   | 32.5                  |
|                                 | No                 | 153                  | 63.8                  |
| <b>STI developed by type</b>    | Vaginal Discharge  | 33                   | 16.3                  |
|                                 | Ureteral discharge | 17                   | 8.3                   |

250  
 251

252 majority of them 211 (87.9%) had first follow-up visit and didn't, have 29 (12.1%). more than half  
 253 125 (52.1%) had a Second follow-up visit the retested no (47.9%) had no, and only 87 (36.3%)  
 254 had a third follow-up visit but 153 (63.8) of them didn't have third follow up visit. All clients were  
 255 assessed for any signs and symptoms of acute HIV infection 240 (100%), HIV retest status, and  
 256 negative 152 (63.3%). No sero-conversion, not done 88 (36.7%), among female Pregnancy follow-  
 257 up status and Negative was 96 (40%) among them 18 (7.5%) were pregnant, and the rest 49  
 258 (20.4%) didn't know their pregnancy status during the follow-up visit. Number, of missed tablets  
 259 48 (20) % of them missed more than five tablets, 67 (27.9%) had missed  $\leq 4$  tablets, and more than  
 260 half 125 (52.1%) didn't know the amount of missed tablet. 165 (68.8%) had got adherence  
 261 counseling during follow-up time but 75 (31.1%) did not, from them Risk reduction provided  
 262 192(80%), among them 39 (36.3%) good Adherence 192 (63.8%) had poor adherences. Only 116  
 263 (48.3%) used family planning methods among these, 19 (7.9%) used condom, 10 (4.2%) OCP,  
 264 injectable 67(27.9%), IUCD and others 20 (8.4%). Only 13% Developed drug side effects from  
 265 them 19(7.9%) Abdominal pain, Vomiting and Fever 20 (8.4%) (Table 4).

266 **Table 4. PrEP initiation and clinical follow up assessment of individuals started PrEP (n=240)**

| Characteristics           | Categories   | Frequency (n) | Percentage (%) |
|---------------------------|--------------|---------------|----------------|
| PrEP initiation in months | 7-12 months  | 74            | 30.8           |
|                           | 13-18 months | 52.8          | 44.2           |
|                           | 19-24 months | 60            | 25.2           |
| Frist follow up visit     | Yes          | 211           | 87.9           |
|                           | No           | 29            | 12.1           |
| Second follow up visit    | Yes          | 125           | 52.1           |
|                           | No           | 115           | 47.9           |
| Third follow up visit     | Yes          | 87            | 36.3           |
|                           | No           | 153           | 63.8           |
| HIV retest status         | Didn't know  | 88            | 36.7           |

|                            |             |     |      |
|----------------------------|-------------|-----|------|
|                            | Negative    | 152 | 63.3 |
| Pregnancy follow up status | Negative    | 96  | 40.0 |
|                            | Positive    | 18  | 7.5  |
|                            | Unknown     | 49  | 20.4 |
| Missed tablets             | + 5 tablets | 48  | 20.0 |
|                            | ≤ 4 tablets | 67  | 27.9 |
|                            | Unknown     | 125 | 52.1 |

267

|                          |                |     |      |
|--------------------------|----------------|-----|------|
| Adherence counseling     | Yes            | 165 | 68.8 |
|                          | No             | 75  | 31.3 |
| Risk reduction provided  | Yes            | 192 | 80.0 |
|                          | No             | 39  | 16.3 |
| Adherence status         | Good           | 134 | 55.8 |
|                          | Poor           | 106 | 44.2 |
| Family planning usage    | Yes            | 116 | 48.3 |
|                          | No             | 115 | 47.9 |
| FP methods               | Condom         | 19  | 7.9  |
|                          | OCP            | 10  | 4.2  |
|                          | Injectable     | 67  | 27.9 |
|                          | IUCD           | 10  | 4.2  |
|                          | Others*        | 10  | 4.2  |
| Provision of condom      | Yes            | 135 | 56.3 |
|                          | No             | 95  | 39.6 |
| Develop drug side effect | Yes            | 39  | 16.3 |
|                          | No             | 201 | 83.8 |
| Type of drug side effect | Fever          | 10  | 4.2  |
|                          | Abdominal pain | 19  | 7.9  |
|                          | Vomiting       | 10  | 4.2  |

268

269 Others\* include natural family planning methods

270 The incidence rate of LTFU of PrEP were followed for a minimum of 7 and maximum of 23 months  
271 of the follow-up period. The total follows up period was 346 person-months (288.7 person years)  
272 of observation, and the median follow-up period was 21.1 (IQR: 6.5 to 22.1). At the end of the  
273 follow-up period, a total of 86 (35.8%) patients experienced loss to follow-up. Hence, the overall  
274 incidence of loss to follow-up was estimated to be 7.3 (95% CI: 4.3-12.6) per 100 person years of  
275 observation.

### 276 *Analyses of robust Poisson regression with outcome of LTFU of PrEP*

277 Univariate analysis at a 25% level of confidence was run to select the variables to fit into the  
278 multivariable analysis robust Poisson regression model and from which Sex, Age, Phone, HIV risk  
279 category, Hepatitis test result, Pregnancy status, TB result, Screened for STI, first and third follow  
280 up visit, pregnancy follows up status, family planning methods usage, provision of adherence  
281 counseling, were found to be significant.

282 In the final model, after adjusting for other covariates being male is associated with a 1.77 times  
283 higher risk of getting lost as compared to being female (ARR=1.770, 95% CI =1.120, 2.797). In  
284 addition, the risk of getting lost from PrEP follow-up youngest (21-30) years was 0.406 times  
285 lower than those aged (51-60) years (ARR=0.406, 95% CI =0.223, 0.738, P-value=0.003).  
286 similarly, those in the age of (31-40) years was associated with a 1.77 times risk of loss compared  
287 with (51-60) years (ARR= 0.391, 0.641 Vs. 1.77 95% CI).

288 Those clients who were knowing their hepatitis B results were associated with 0.29 times lower  
289 than who didn't know their results (ARR=0.29, 95% CI =0.20-0.42). Clients who didn't Screen  
290 for STI were 8.53 times higher than those who were screened for STI (ARR=8.53, 95% CI=4.10-  
291 17.74).

292 Those who had a first follow-up visit according to their follow-up time were associated with 18.1%  
 293 lower chances for lost than as compared to those who didn't have a first follow-up visit  
 294 (ARR=1.81, 95% CI=1.211-2.72). In the addition, those who had a didn't have third follow-up  
 295 visit according to their follow-up time were associated with 1.08 times for lost than as compared  
 296 to those who have a third follow-up visit (ARR=1.08, 95% CI=1.27, 2.59). Among female PrEP  
 297 users, those who didn't know their pregnancy status during each follow-up visit were 4.28 times  
 298 higher in the risk of LTFU compared to who did know about their pregnancy (ARR=4.28, 95%  
 299 CI=3.04, 6.01).

300 Those clients who had no adherence counseling were associated with 1.86% times higher in the  
 301 risk of LTFU as compared to those who had adherence counseling (ARR=1.86, 95% CI =1.18,  
 302 2.93). Those who didn't used family planning methods had 2.29 times higher in the chances of  
 303 LTFU of PrEP than those who used any family planning methods (ARR=2.29, 95% CI =1.39,  
 304 3.78) table 5.

305 **Table 5. Risk factor associated with lost follow up of Pre exposure users (n=240).**  
 306

| Variable            |        | Crude relative risk (CRR) (95%, CI) | Adjusted relative risk ARR (95%, CI) | P-value |
|---------------------|--------|-------------------------------------|--------------------------------------|---------|
| <b>Sex</b>          |        |                                     |                                      |         |
|                     | Male   | 2.261(1.619,3.159)                  | <b>1.770 (1.120,2.797)</b>           | 0.014*  |
|                     | Female | 1                                   | 1                                    |         |
| <b>Age</b>          |        |                                     |                                      |         |
|                     | 21-30  | 0.313(0.196, 0.500)                 | <b>0.406 (0.223, 0.738)</b>          | 0.003*  |
|                     | 31-40  | 0.328(0.213, 0.506)                 | <b>0.391 (0.238, 0.641)</b>          | 0.000*  |
|                     | 41-50  | 0.704(0.482,1.030)                  | .0729(0.455, 1.166)                  | 0.187   |
|                     | 51-60  | 1                                   | 1                                    |         |
| <b>Condom usage</b> |        |                                     |                                      |         |



|                                          |              |                     |                             |        |
|------------------------------------------|--------------|---------------------|-----------------------------|--------|
|                                          | No           | 0.319(0.205,0.496)  | <b>0.290 (0.202,0.418)</b>  | 0.000* |
|                                          | Yes          | 1                   | 1                           |        |
| <b>Screened for STI</b>                  |              |                     |                             |        |
|                                          | No           | 2.622(1.968,3.493)  | <b>8.533(4.103 ,17.744)</b> | 0.000* |
|                                          | Yes          | 1                   | 1                           |        |
| <b>first follow up visit</b>             |              |                     |                             |        |
|                                          | No           | 2.205 (1.608,3.023) | <b>1.815 (1.211,2.720)</b>  | 0.004* |
|                                          | Yes          | 1                   | 1                           |        |
| <b>Pregnancy follow up status</b>        |              |                     |                             |        |
|                                          | Didn't known | 0.437(0.312,0.612)  | <b>4.277 (3.043-6.012)</b>  | 0.000* |
|                                          | Negative     | 1                   | 1                           |        |
| <b>provision of adherence counseling</b> |              |                     |                             |        |
|                                          | No           | 1.661(1.196, 2.307) | <b>1.863 (1.184-2.930)</b>  | 0.003* |
|                                          | Yes          | 1                   | 1                           |        |
| <b>family planning methods usage</b>     |              |                     |                             |        |
|                                          | No           | 3.079(1.965,4.826)  | <b>2.290 (1.389-3.776)</b>  | 0.001* |
|                                          | Yes          | 1                   | 1                           |        |

307

## 308 **DISCUSSION**

309 Loss to follow-up is the major difficulty and it complicates the evaluation of HIV prevention and  
 310 intervention programs. This study assessed the incidence and its predictors of loss to follow-up  
 311 among key and priority population groups who started PrEP. In this study, 86 (35.8%) experienced  
 312 loss to follow-up and the overall incidence rate of loss to follow-up was 7.3 (95% CI: 4.3-12.6)  
 313 per 100 person-years of observation (PYs). In this study, we document a higher LTFU rate than  
 314 previously reported in the PrEP period (35.8 vs. 23.9 per 100PY) (19).

315 In the study found that gender was significantly associated with lost follow up of PrEP. The  
316 incident rate for male PrEP user is 1.77 times the incidence rate for females. High adherences is  
317 especially important among male, as compared to women using PrEP, to achieve high efficacy of  
318 PrEP because of differences in perception and health seeking behavior (20).

319 Approach based on their gender during initiation of PrEP and during their follow up time based  
320 on their needs, Providers' suggestion and support of PrEP use have also been suggested as effective  
321 solutions to improve retention in PrEP care in a variety of diverse situations (21, 22). This  
322 study shows that PrEP patients are at high risk of loss to follow-up at the early stage of  
323 PrEP initiation was 1.815 times LTFU the incidence who didn't have first follow up visit).  
324 Probability of retention in PrEP care among patients who are in preexposure prophylaxis. At the  
325 time of stage of PrEP initiation could be promising to prevent loss to follow-up among those likely  
326 to discontinue. Targeted interventions are needed to focus on populations currently underserved  
327 by existing services to improve retention in PrEP care (23).

328 Likewise, the incident rate in the age of 21-30 and 31-40 years is 0.406 and 0.39 times the  
329 incident rate for 51-60 years of age groups remaining other variables are constant respectively. The  
330 possible reason might be that the younger age group could be more mobile than the older one and  
331 may face the fear of discrimination and stigma. The other possible reasons might be immaturity in  
332 analytical thinking and particular challenges associated with young age(24).

333 Provision of adherence counselling had a statistically significant association with the  
334 incidence rate of LTFU. Those clients who hadn't have adherence counselling were 1.66 times at  
335 higher risk of loss to follow-up compared to those with adherence counseling. "The possible  
336 explanation might be that those health providers provision adherence counselling levels may have

337 different skills practice, counseling problems that affect client’s adherence initially and during  
338 follow up time which further affect their retention in PrEP user.”

339 Using contraception methods with clients were significantly associated with LTFU of PrEP. in  
340 the study showed that high LTFU to PrEP has been found among PrEP user who didn’t use  
341 contraception methods. We can therefore see a link between lost follow up and contraceptive use  
342 and therefore intensified contraceptive counseling and screening before PrEP initiation and during  
343 PrEP use may improve PrEP adherence among users (25).

344 From the results, LTFU to PrEP has also been found to be higher among who do not use  
345 condoms; this is alarming since PrEP is being promoted as a method of HIV prevention that should  
346 be used in combination, or as a back-up method that one can use when she fails to use condoms.  
347 In this case counselors need to emphasize the need adhere to PrEP well if from their interactions  
348 they find that the use of condoms is challenging for the client. The the higher LTFU to PrEP among  
349 users who don’t use condoms could have been due to poor HIV risk perception and  
350 misunderstandings about the duration of action of PrEP to protect against HIV.

351 The health belief model (26) explains that people will not change their health behaviors unless  
352 they believe that they are at risk; in this case, those who do not think that they are at risk of  
353 acquiring HIV are unlikely to use a condom or take PrEP. This furthermore underscores the need  
354 for interventions to improve the evaluation of risk perception among PrEP users. Qualitative data  
355 may better explain higher LTFU among lower condom use.

356 In the finding, there was a total of 35.8% lost follow up of PrEP which is similar studies done  
357 in USA was 36% (27). A study Nigeria LTFU was 66.7% and in this study 77% due to adherences  
358 problem (28). poor adherences to PrEP, history of STI and younger age was associated with lost  
359 follow up of PrEP (28). another study in Uganda LTFU of PrEP in female sex worker was 42%

360 (29) which is similarly to 39.6% in this study. Given from the findings, and evidence in the  
361 literature, PrEP clients had highest LTFU happened in first follow up visit 32% (30) and in this  
362 study, it was 76.7%.

### 363 *Study Strengths and Limitations*

364 While this study provides information on lost follow-up of clients and supports future  
365 development and improvement of retention among pre-exposure prophylaxis users a number of  
366 limitations were encountered through the health center in the study design.

367 Patient record availability was limited, due to the recent implementation of a PrEP in late 2019 and  
368 lack of registration system.

369 Due to the nature of the secondary source of data, some missed variables like status of mental  
370 illness, stigma and discrimination, distance from the health facility, and economic status, might be  
371 predictors. In addition to these, charts with an incomplete record of 20% and transferred outpatients  
372 were excluded; this might lead to underestimating or overestimating the incidence rate of loss to  
373 follow-up. Information bias, specifically misclassification of exposure status, may have been  
374 present if the client's chart did not answer questions.

375 Missing data impacted a number of variables evaluated in this study; this may lead to selection  
376 bias. As strength the it Fills gaps in research and become Baseline for further studies.

377

### 378 **CONCLUSIONS**

379 Barriers to PrEP adherence such as use of contraception need to be addressed for successful PrEP  
380 implementation to improve adherence going forward. There is need for service care providers to  
381 reinforce positive behaviors such as use of other HIV prevention measures such as condoms

382 devotedly when there is a break from taking PrEP. Intensified contraceptive counseling and  
383 screening may improve PrEP adherence among users.

384 Therefore, PrEP adherence strategies should be developed and designed as a holistic approach,  
385 acknowledging the contextual factors of key and priority populace groups. centered interventions  
386 thinking of socio-demographic and individual preferences have the capability to assure the highest  
387 adherence stage.

### 388 *Recommendations*

389 Based on the above findings, federal MOH of Ethiopia should adopt and incorporate WHO  
390 guidelines for these key and priority population in HIV prevention should be implemented at each  
391 level of health centers. the Findings suggest that comprehensive strategies are warranted to  
392 improve PrEP continuum of care outcomes in key and priority populations.

393 Multi-modal strategies are most impactful for retention of PrEP after initiation PrEP adherence  
394 strategies should be developed and designed as a holistic approach, each health care providers and  
395 concerned bodies should Use the current protocol preprend by of MOH Ethiopia for those key and  
396 priority population in HIV prevention and care like, Client centered and Targeted interventions  
397 approach is needed ,Gender based approach during initiation of PrEP, Targeted interventions focus  
398 at first initiation ,Provision of adherence counselling ,Intensified contraceptive counseling and  
399 screening, Emphasize on provision and of use of condom.

400 A qualitative study should be applied to obtain information from LTFU patients themselves by  
401 tracing them and the health service quality and satisfaction level of patients need to be addressed.

402 Furthermore, a prospective cohort study needs to be conducted and a qualitative study should be  
403 applied to obtain information from LTFU patients themselves by tracing them and the health  
404 service quality and satisfaction level of patients need to be addressed.

#### 405 *Acknowledgment*

406 I amplify my true appreciation to my advisor Fentaw Tadese who made a difference in me  
407 beginning from proposal writing up to point-by-point investigation and introduction of my thesis  
408 work.

409 My extraordinary obliged to go to all health Center authorities for permitting me to urge the  
410 essential data and all the medical Professional for their dynamic participation all through the  
411 information collection period. And goes to my families who are continuously making a difference  
412 on the side me up to my completion of the work.

413

414 **Funding:** This work was having no funding support

#### 415 **References**

- 416 1. Grimsrud A, Barnabas RV, Ehrenkranz P. Evidence for scale up: the differentiated care  
417 research agenda. J Int AIDS Soc. 2017; 20:1–6.
- 418 2. FMOH, National JSS REPORT, 2021.
- 419 3. UNAIDS. Get on the Fast Track. Geneva, 2016.
- 420 4. WHO: Consolidated guidelines on the use of antiretroviral drugs for treating and  
421 preventing HIV infection: recommendations for a public health approach – 2nd ed., 2016.  
422 .
- 423 5. Grimsrud A, Bygrave H, Doherty M, et al. Reimagining HIV service delivery: the role of  
424 differentiated care from prevention to suppression. JIAS. 2016, 19:21484.
- 425 6. International AIDS Society. Differentiated Care for HIV: A Decision Framework for ART  
426 Delivery, 2016. .
- 427 7. Fast-Track – ending the AIDS epidemic by 2030. Geneva: UNAIDS; 2014  
428 ([http://www.unaids.org/en/resources/documents/2014/JC2686\\_WAD2014report](http://www.unaids.org/en/resources/documents/2014/JC2686_WAD2014report), accessed  
429 1 November 2015). .
- 430 8. Fox MP, Rosen S. Retention of Adult Patient on Antiretroviral Therapy in Low- and  
431 Middle-Income Countries: Systematic Review and Meta-analysis 2008- 2013. J Acquir  
432 Immune Defic Syndr. 2015; 69(1):98-108.

- 433 9. Abnet G, Dawit B, Imam M, Tsion L, Yonas A. City profile of Addis Ababa. EiABC-  
434 Ethiopian Institute of Architecture Building Construction and City Development. 2017:5-  
435 7.
- 436 10. DATA U. UNAIDS reference. 2019.
- 437 11. Implementation manual for pre -exposure prophylaxis (PrEP) of HIV infection. In: EMOH,  
438 editor. 2019.
- 439 12. UNAIDS. On the fast track to end acquired immunity defiance diseases (AIDS). 2016.
- 440 13. Boender TS, Sigaloff KC, McMahon JH et al. Long-term Virological Outcomes of  
441 FirstLine Antiretroviral Therapy for HIV-1 in Low- and Middle-Income Countries: A  
442 Systematic Review and Meta-analysis. *Clin Infect Dis*. 2015;61(9):1453-61. .
- 443 14. Central Statistical Agency (CSA) [Ethiopia] and ICF International. Ethiopia  
444 Demographic and Health Survey: HIV Report. Addis Ababa, Ethiopia, and Rockville, Maryland,  
445 USA. 2016.
- 446 15. Anyona MO. Determinants of condition of pre-exposure prophylaxis. 2019.
- 447 16. Elizabeth W., Wahome. Grahama N. Et.al. PrEP uptake and adherence in relation to HIV1  
448 incidence among Kenyan men who have sex with men. *The lancet*. September 2020. 17.  
449 WHO. Guideline on when to start Antiretroviral Therapy and on Pre-Exposure  
450 Prophylaxis for HIV (2015) accessed on 2017.
- 451 18. Baral S, Beyrer C, Muessig K, et al. Burden of HIV among female sex workers in  
452 lowincome and middle-income countries: a systematic review and meta-analysis. *Lancet Infect*  
453 *Dis*.  
454 2012; 12:538-49.
- 455 19. Pillay D, Stankevitz K, Lanham M, Ridgeway K, Murire M, Briedenhann E, et al. Factors  
456 influencing uptake, continuation, and discontinuation of oral PrEP among clients at sex worker  
457 and MSM facilities in South Africa. *PLoS One*. 2020;15:e0228620.
- 458 20. Sheth AN, Rolle CP, Gandhi M. HIV pre-exposure prophylaxis for women. *Journal of*  
459 *Virus Eradication*. 2016;2(3):149. <https://www.ncbi.nlm.nih.gov/pmc/articles/PMC4967966/>  
460 Accessed on 7/28/2020.
- 461 21. Kenison TC, Badenhop B, Safo S. Unlocking HIV preexposure prophylaxis delivery:  
462 Examining the role of HIV providers in pre-exposure prophylaxis care. *AIDS Patient Care STDs*  
463 2020; 34:251–258.
- 464 22. BrantAR, Dhillon P, Hull S, et al. Integrating HIV pre-exposure prophylaxis into family  
465 planning care: A RE-AIM framework evaluation. *AIDS Patient Care STDs* 2020; 34:259–266.
- 466 23. Jun T, Madeline C, Montgomery W, et al. Loss to Follow-Up and Re-Engagement in HIV  
467 Pre-Exposure Prophylaxis Care in the United States, *AIDS PATIENT CARE and STDs Volume*  
468 35, Number 7, 2021 @Mary Ann Liebert, Inc. DOI: 10.1089/apc.2021.0074 2013–2019. 24.
- 469 Mathewos A, Mekdes K, Haymanot N, Melkamu M, A. D. Predictors of Loss to Follow-  
470 Up among HIV-Infected Adults after Initiation of the First-Line Antiretroviral Therapy at Arba  
471 Minch General Hospital, Southern Ethiopia: A 5-Year Retrospective Cohort Study. *Hindawi*  
472 *BioMed Research International Volume* 2021, Article ID 8659372,  
473 <https://doi.org/10.1155/2021/8659372>. Received 8 June 2021; Revised 25 October 2021;  
474 Accepted 30 October 2021; Published 11 November 2021.
- 475 25. Nalukwago GK, Isunju JB, Muwonge T, Katairo T, Bunani N, Semitala F, et al.  
476 Adherence to oral HIV pre-exposure prophylaxis among female sex workers in Kampala,  
477 Uganda. *Afri Health Sci*. 2021;21(3). 1048-1058. <https://dx.doi.org/10.4314/ahs.v21i3.12>. 26.

- 478           Rosenstock IM. The health belief model and preventive health behavior. Health  
479 Education Monographs. 1974;2(4):354-86. <https://doi.org/10.1177%2F109019817400200405>  
480 Accessed on 7/28/2020.
- 481 27.     Douglas K, Kevin M, Victoria E, et al. Patterns and clinical consequences of  
482 discontinuing HIV preexposure prophylaxis during primary care Krakower D et al. Journal of the  
483 International                    AIDS                    Society                    ,                    22:e25250  
484 <http://onlinelibrary.wiley.com/doi/10.1002/jia2.25250/full> | <https://doi.org/10.1002/jia2.25250>.  
485 2019.
- 486 28.     Adetunji O, Adewale S, M K. Pre-exposure prophylaxis in sero-discordant male partners  
487 of human immune deficiency virus (HIV) positive women desirous of natural conception  
488 – a clinical setting experience, Journal of AIDS and HIV Research. july ,2013; Vol. 5(7),  
489 : 269-
- 490 74.DOI 10.5897/JAHR2013.0252 ISSN 2141-2359 © 2013 Academic Journals  
491 <http://www.academicjournals.org/JAHR>  
492
- 493 29.     Joseph K , B J, Hadijja N, et al. Uptake and retention on HIV pre-exposure prophylaxis  
494 among key and priority populations in South-Central Uganda ,Journal of the International  
495 AIDS Society , 23:e25588 <http://onlinelibrary.wiley.com/doi/10.1002/jia2.25588/full> |  
496 <https://doi.org/10.1002/jia2.25588>.  
497 2020.
- 498 30.     Jason B, Rupa R, Rachel B Lessons from a Decade of Voluntary Medical Male  
499 Circumcision Implementation and their Application to HIV Pre-Exposure Prophylaxis  
500 Scale Up. SAGE. 2018.  
501
